# Supplementary material
Source: ML conference proceedings conference paper supplement (https://openreview.net/forum?id=S0eeRL8jcec)

Linear SCM

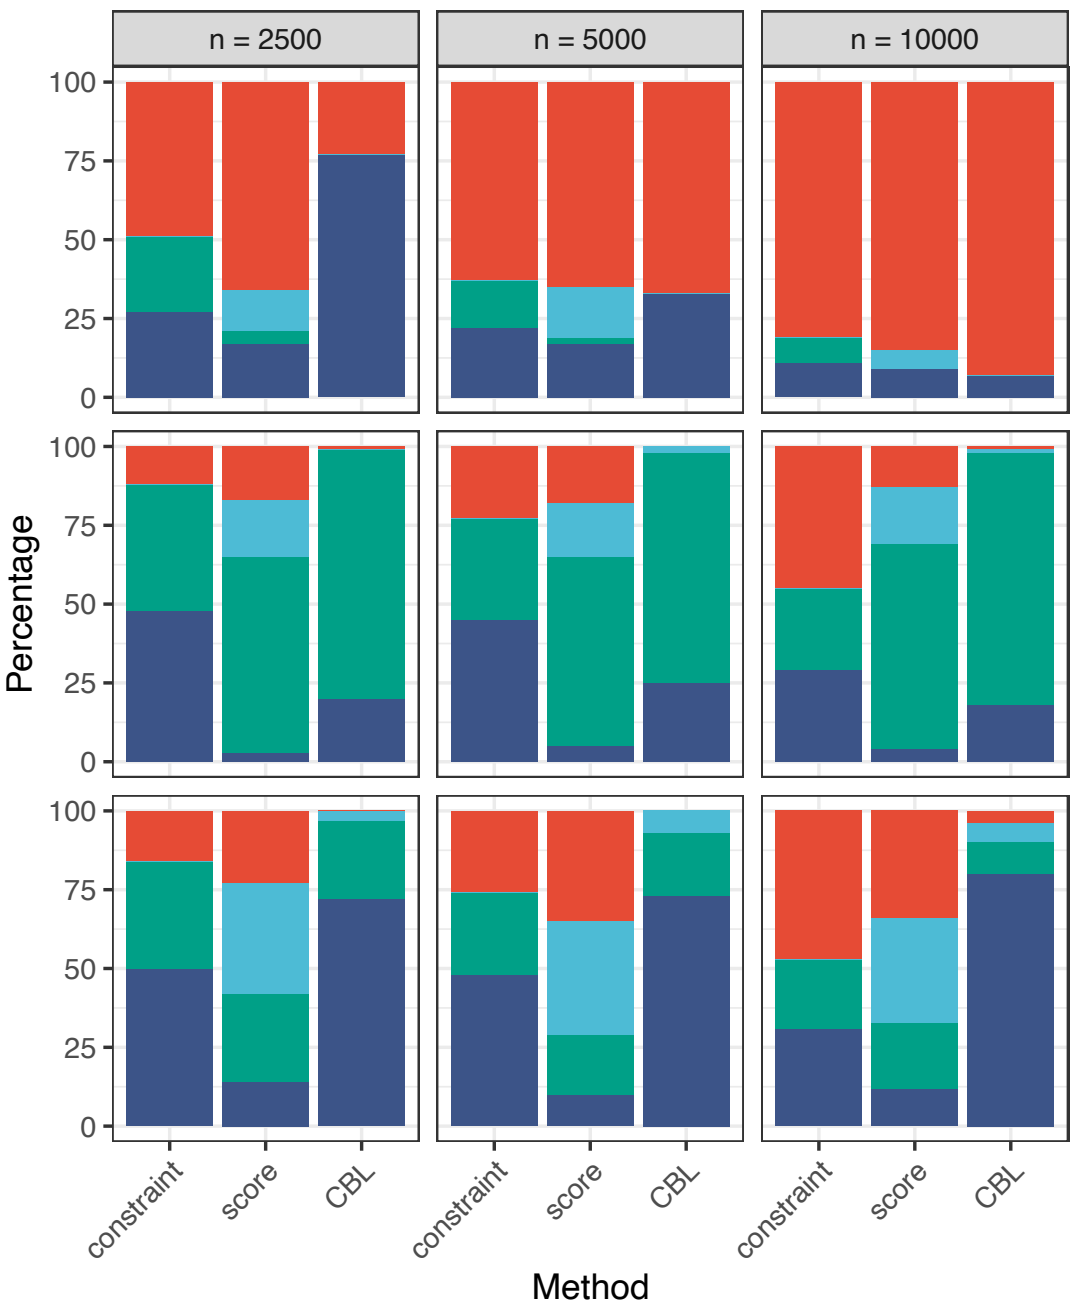

Nonlinear SCM

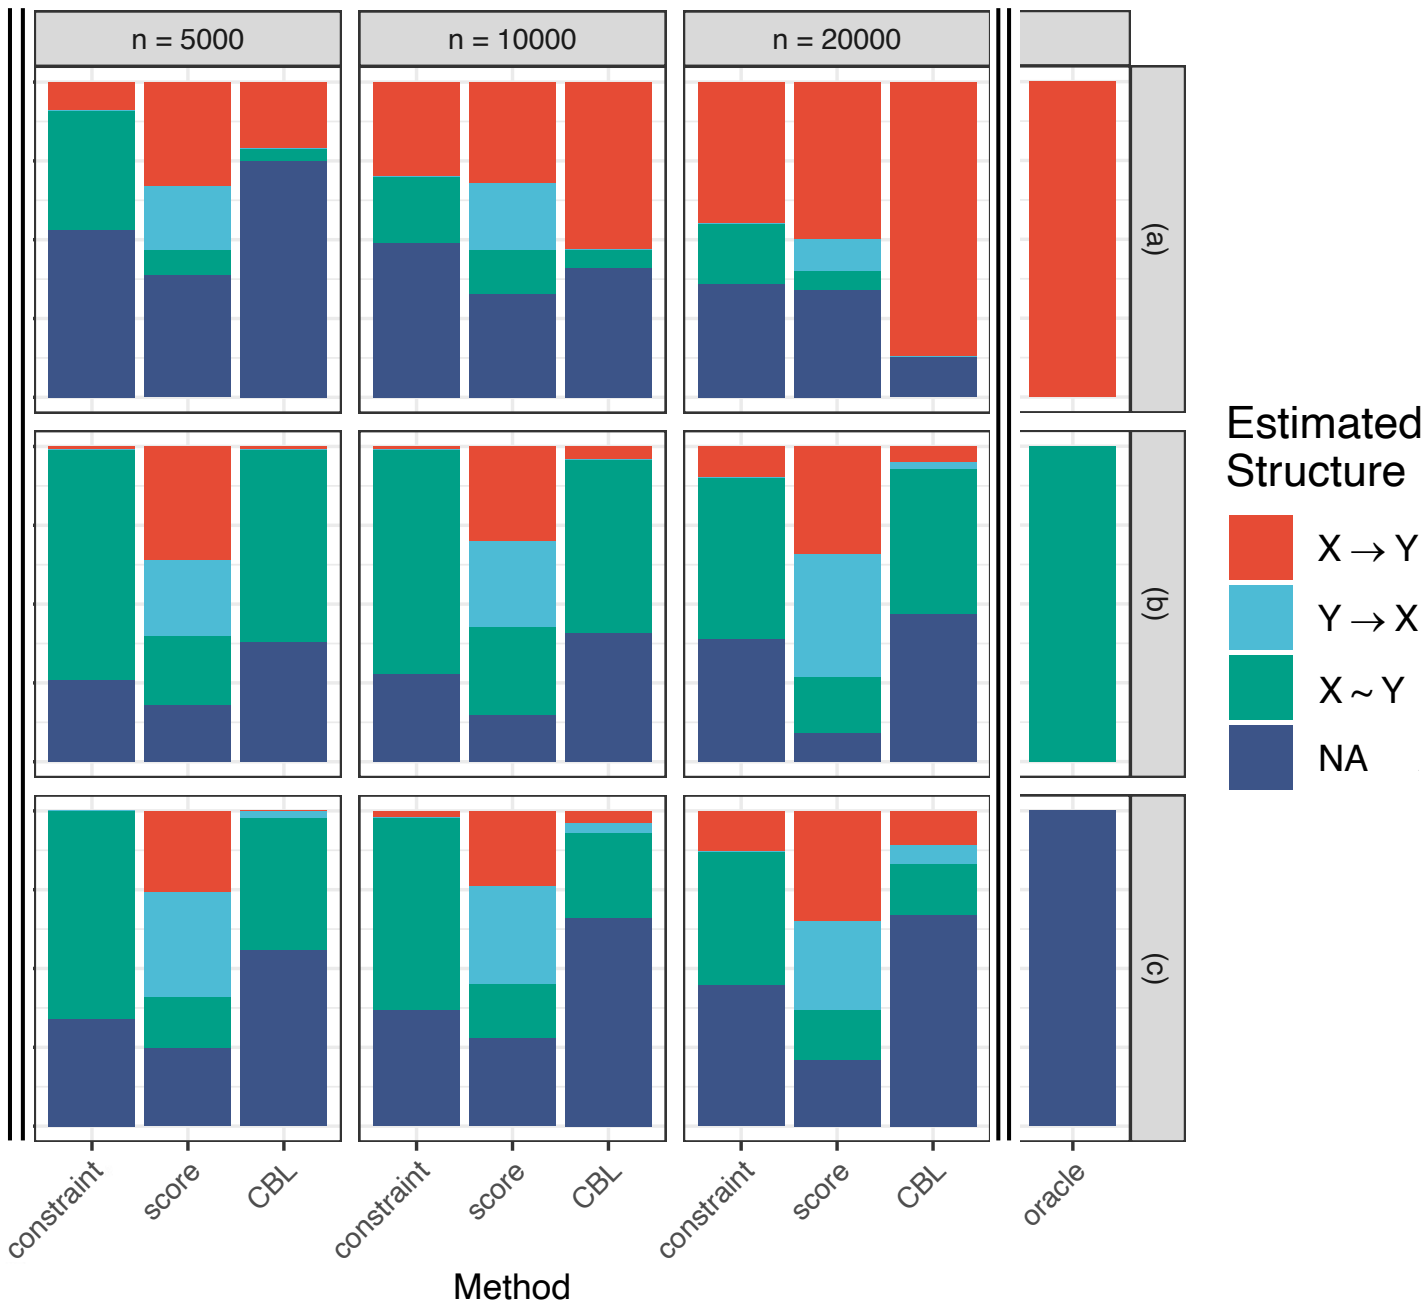

Supplement: supplementary_material [file attachment]

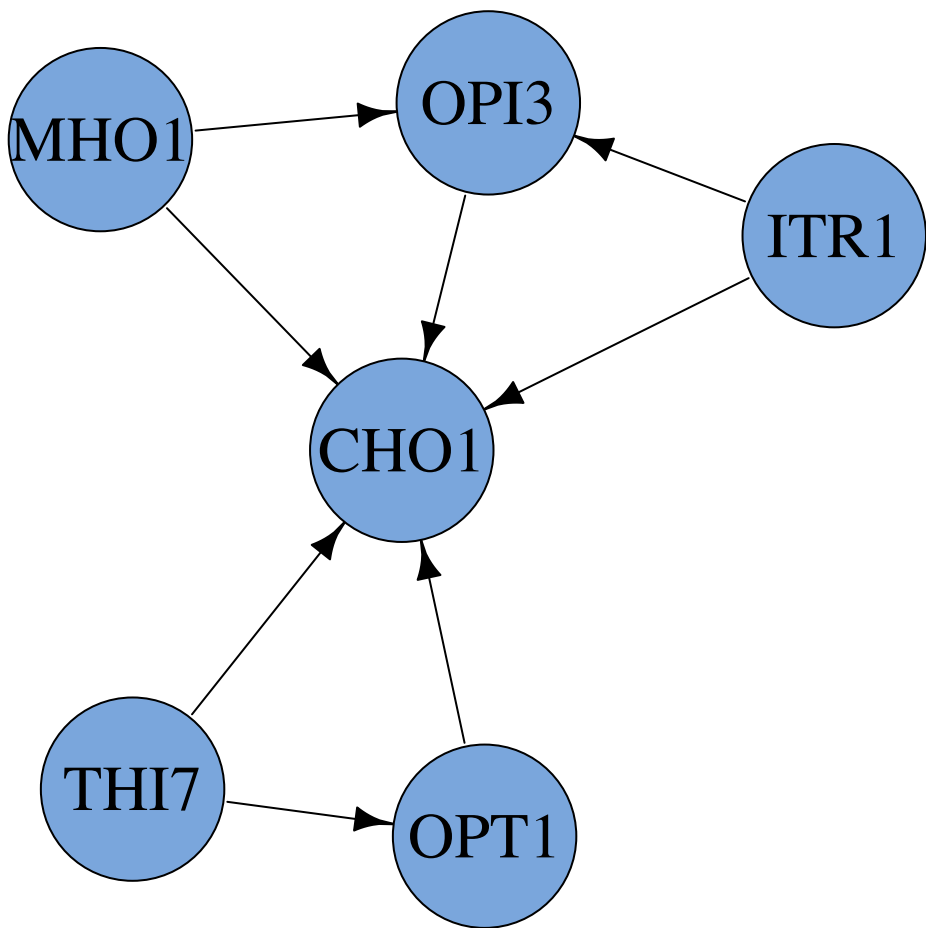

Supplement: supplementary_material [file attachment]

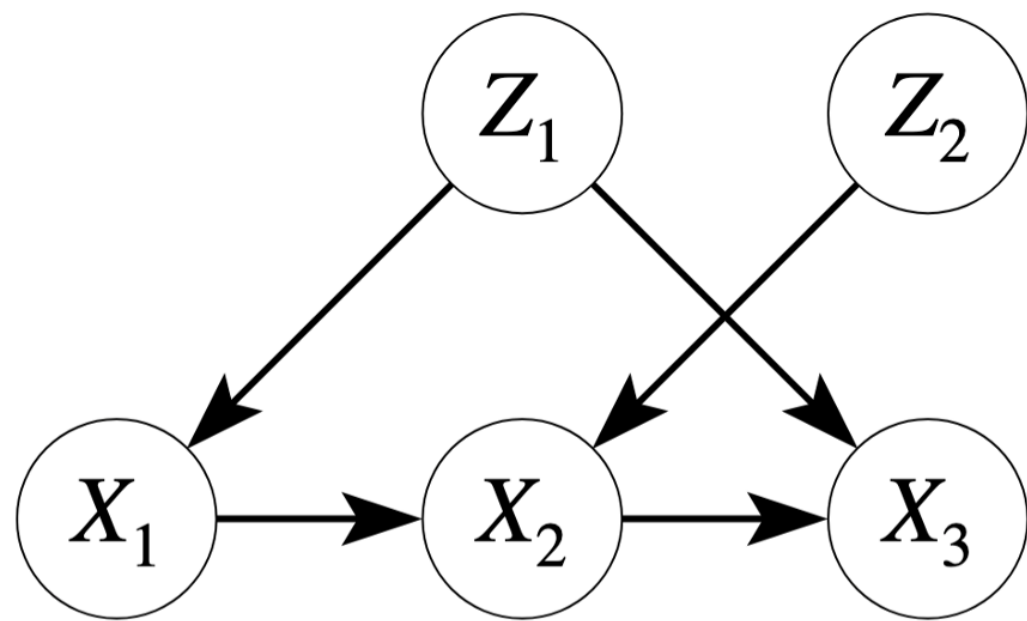

A

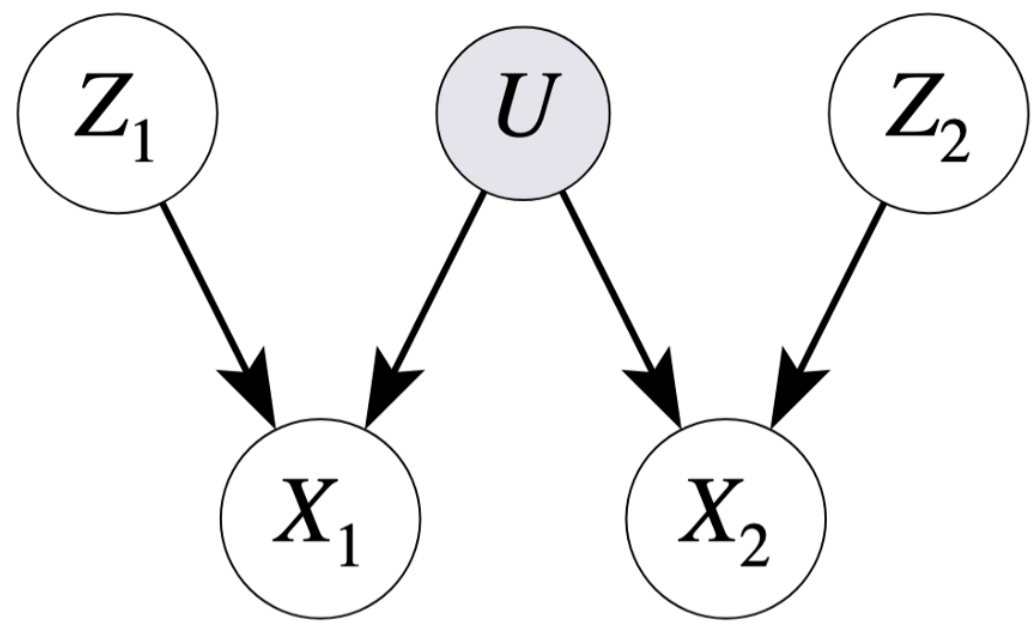

B

Supplement: supplementary_material [file attachment]

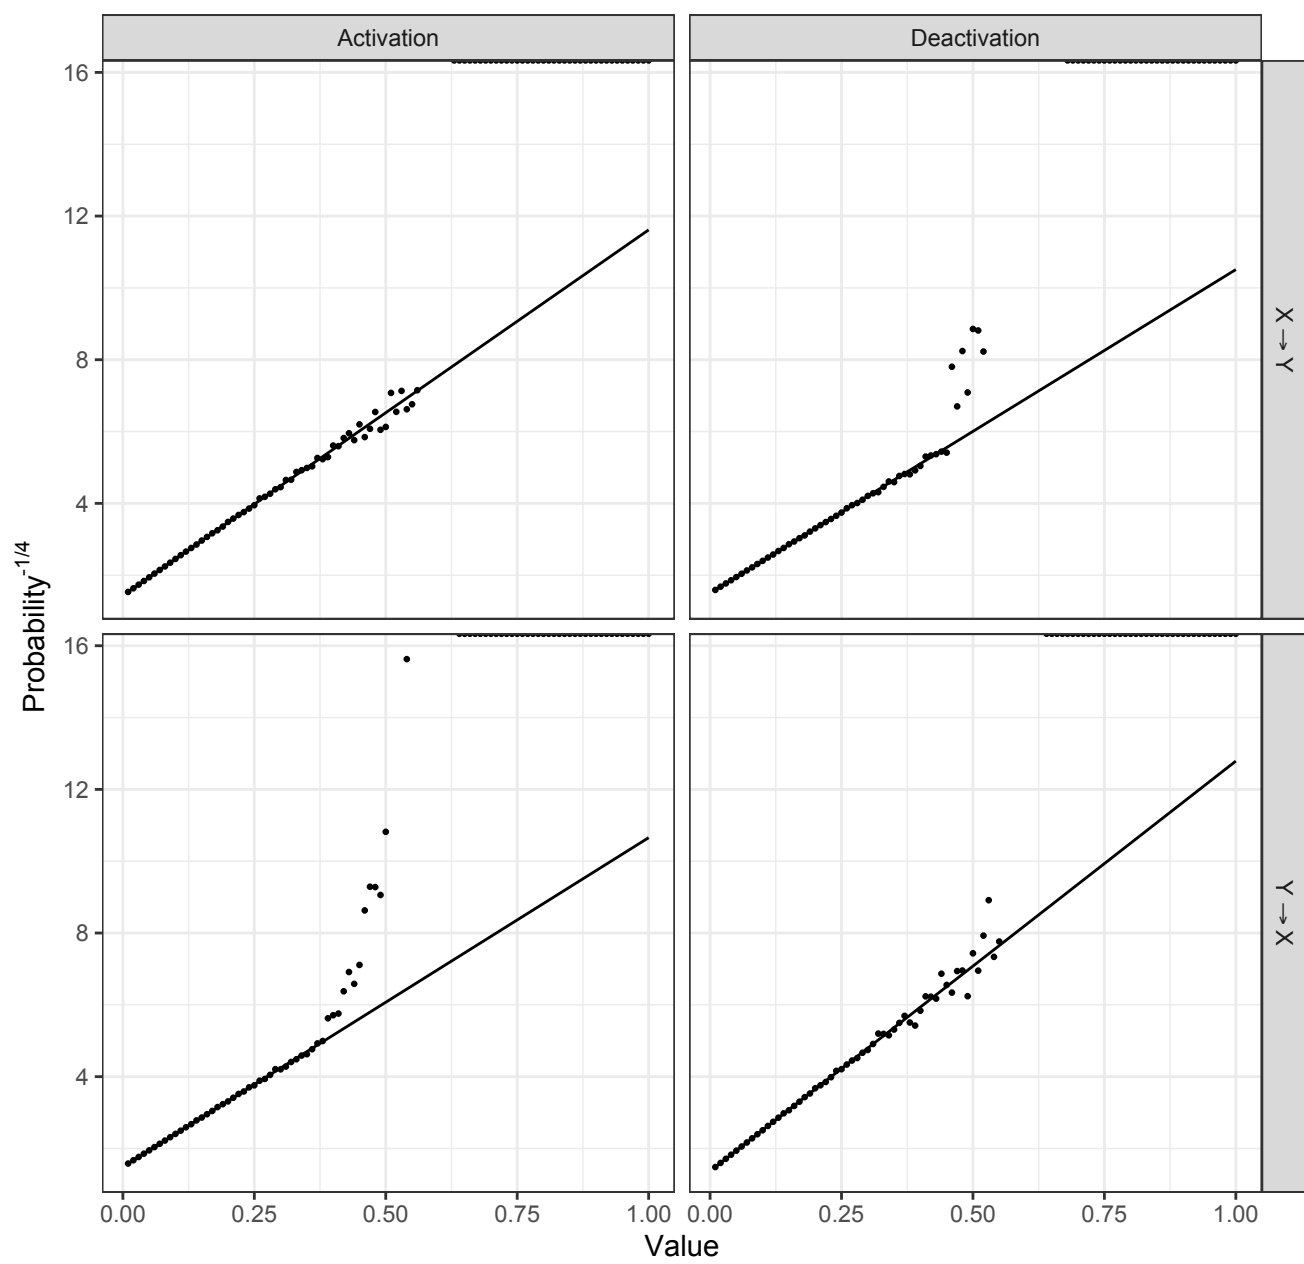

Supplement: supplementary_material [file attachment]

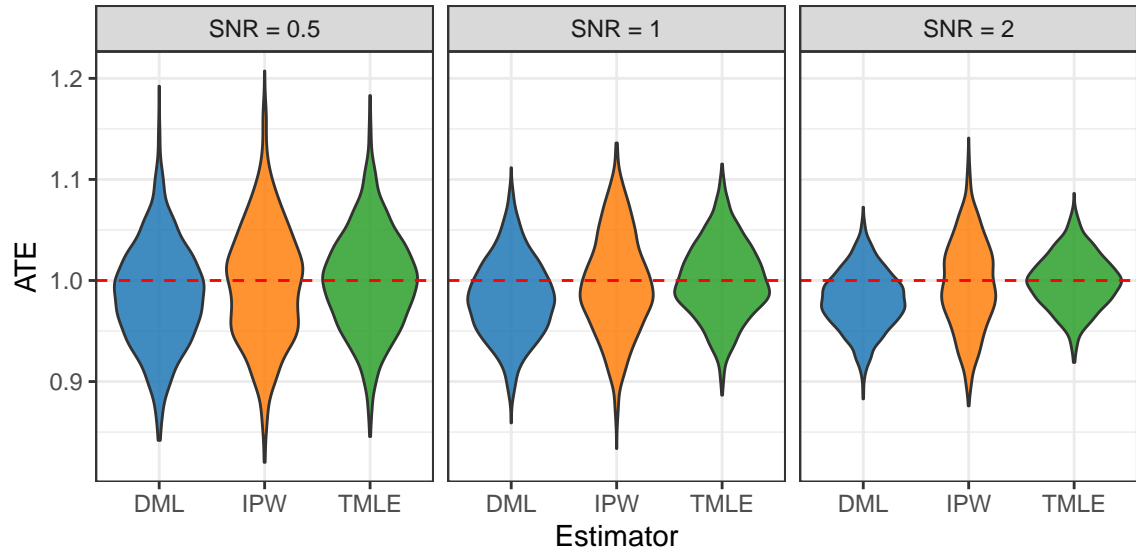

Supplement: supplementary_material [file attachment]

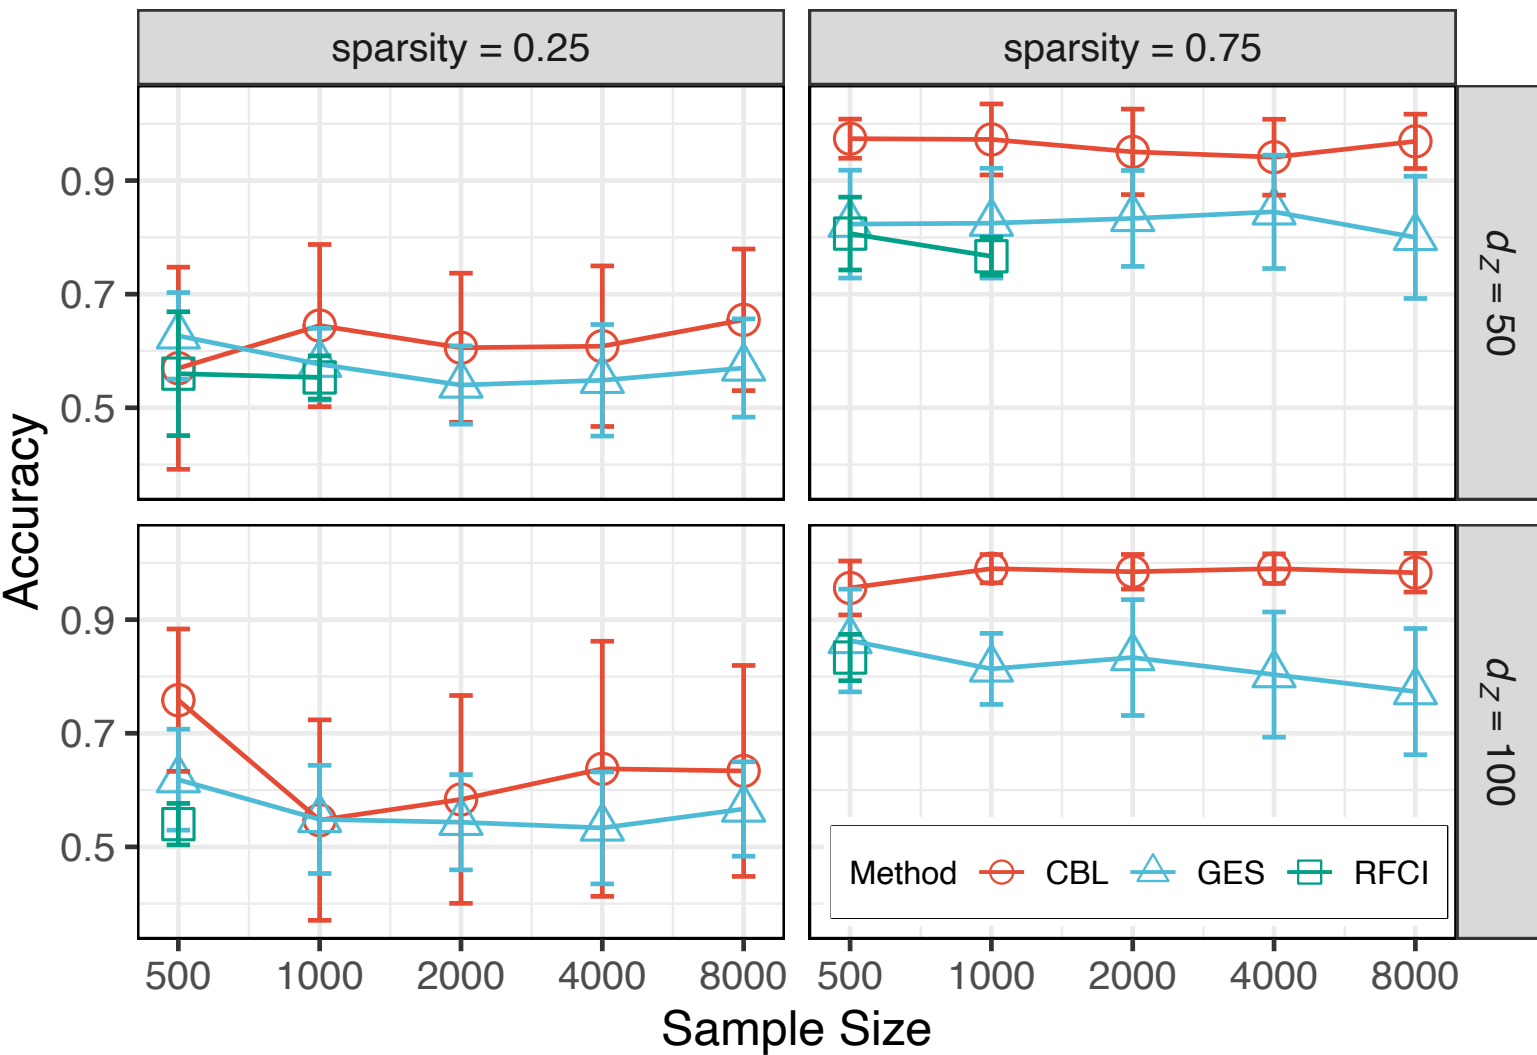

Supplement: supplementary_material [file attachment]

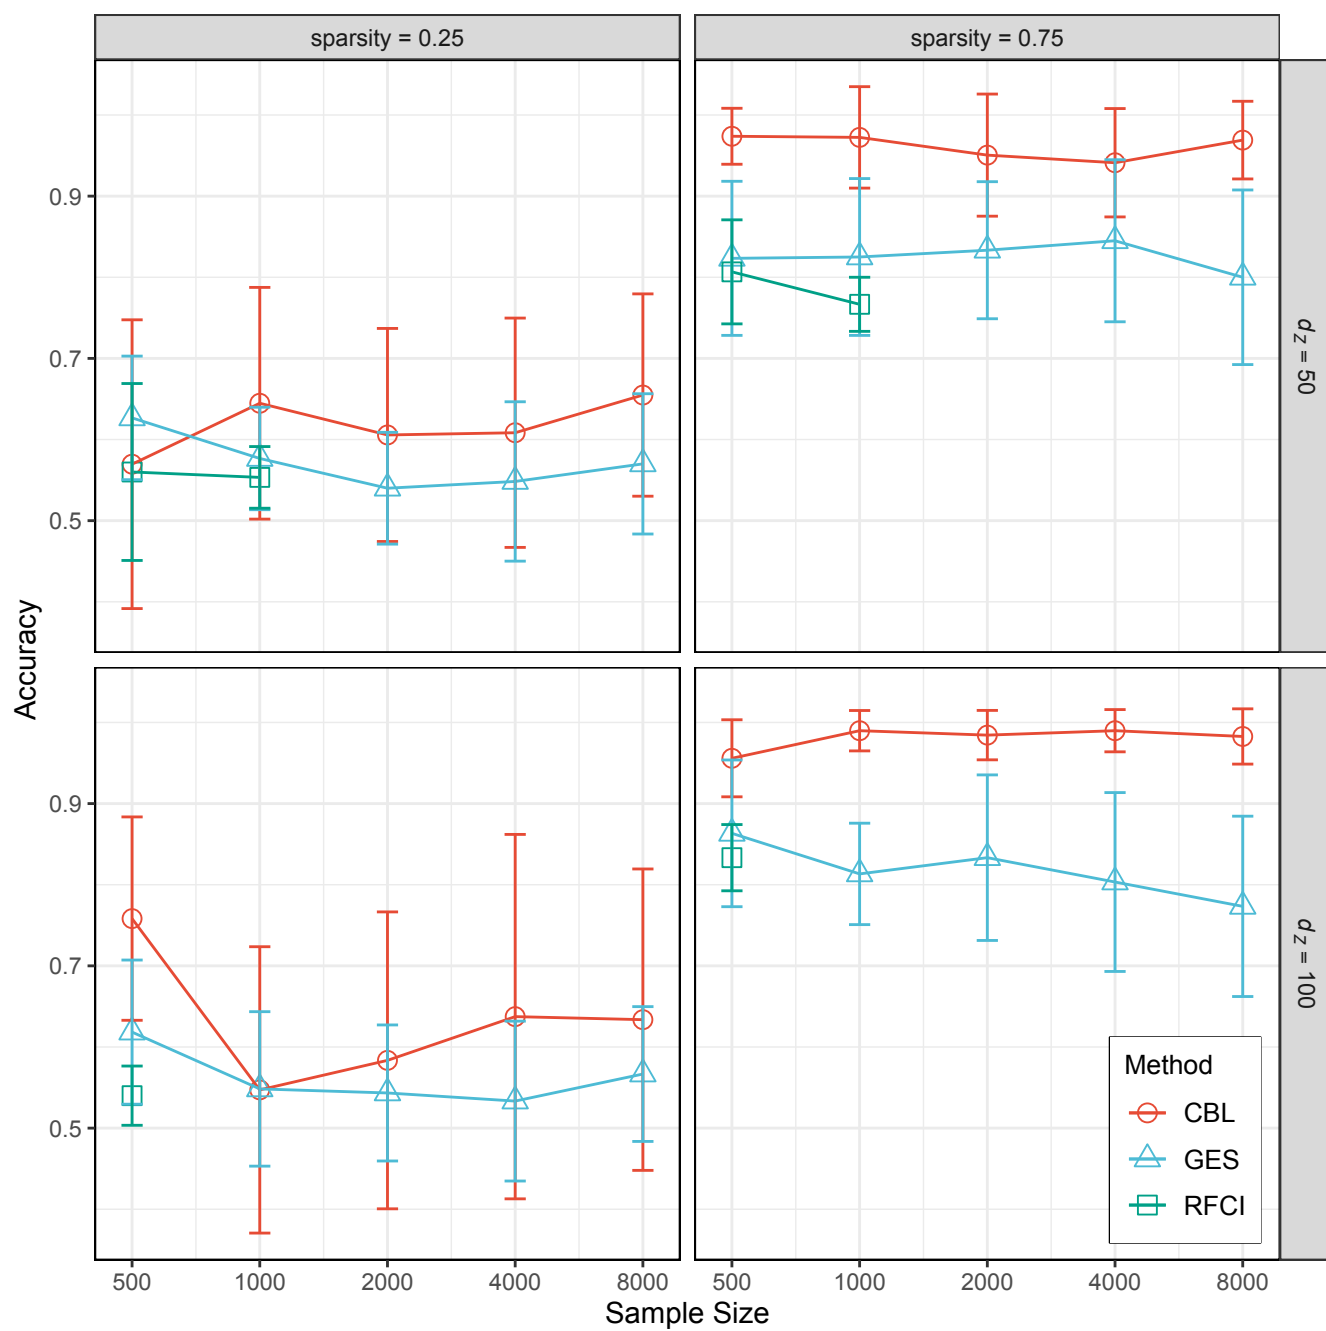

Supplement: supplementary_material [file attachment]

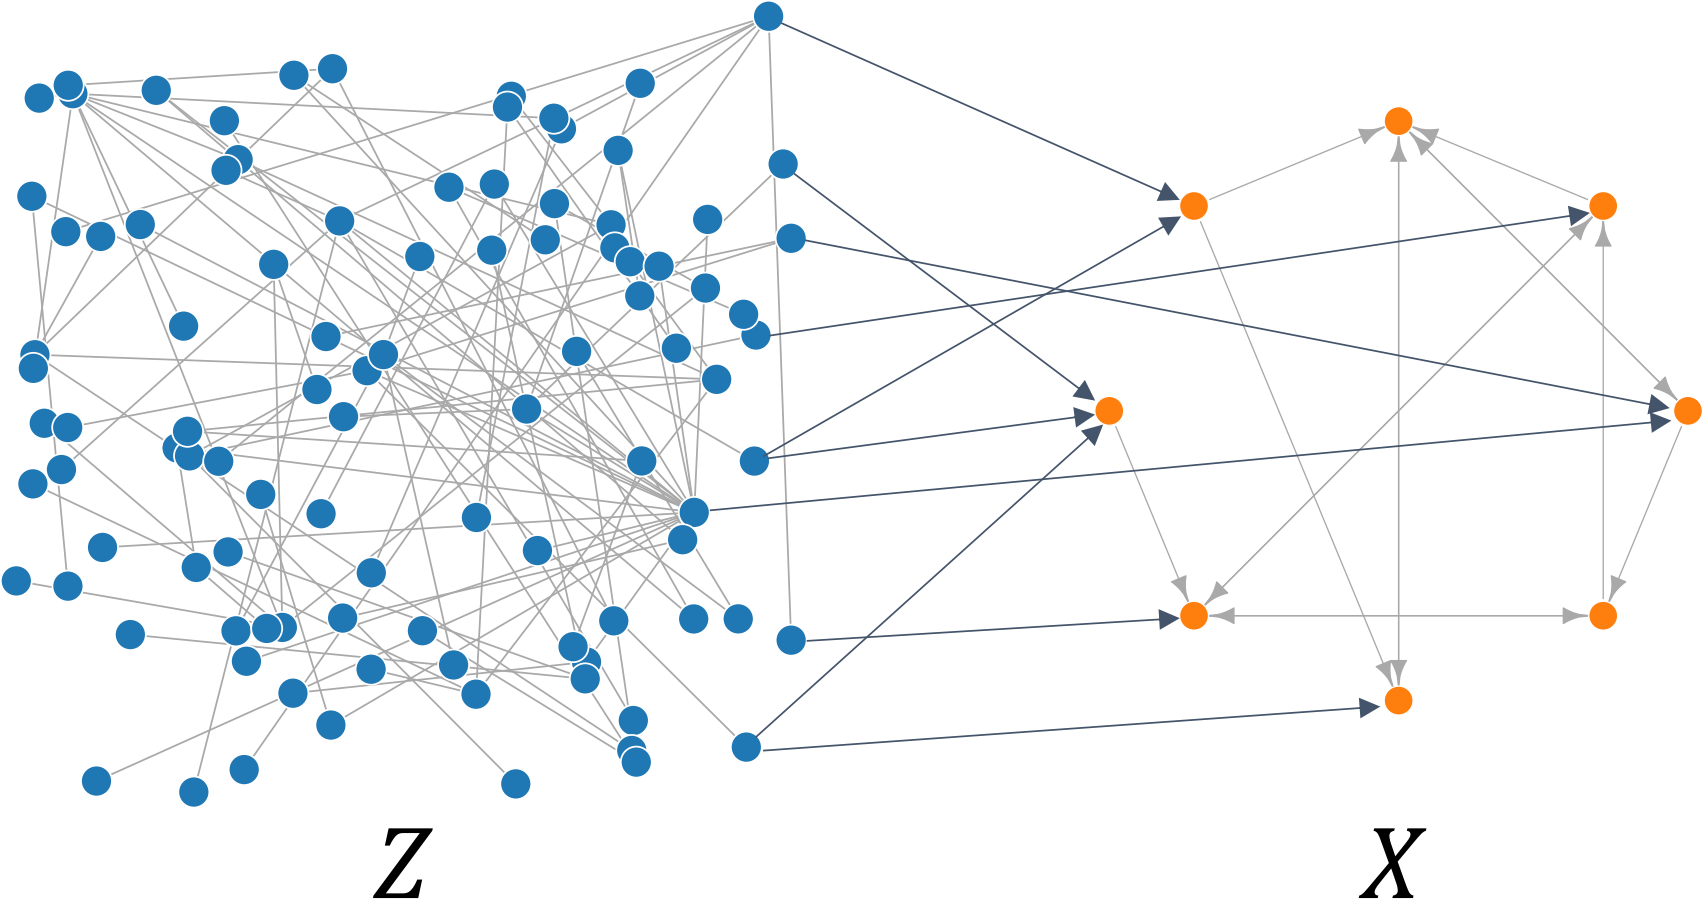

Supplement: supplementary_material [file attachment]
